# Supplementary material
Source: PubMed Central journal article supplement (PMC4433310)
Supplement: NIHMS266974-supplement-01.pdf [file NIHMS266974-supplement-01.pdf]

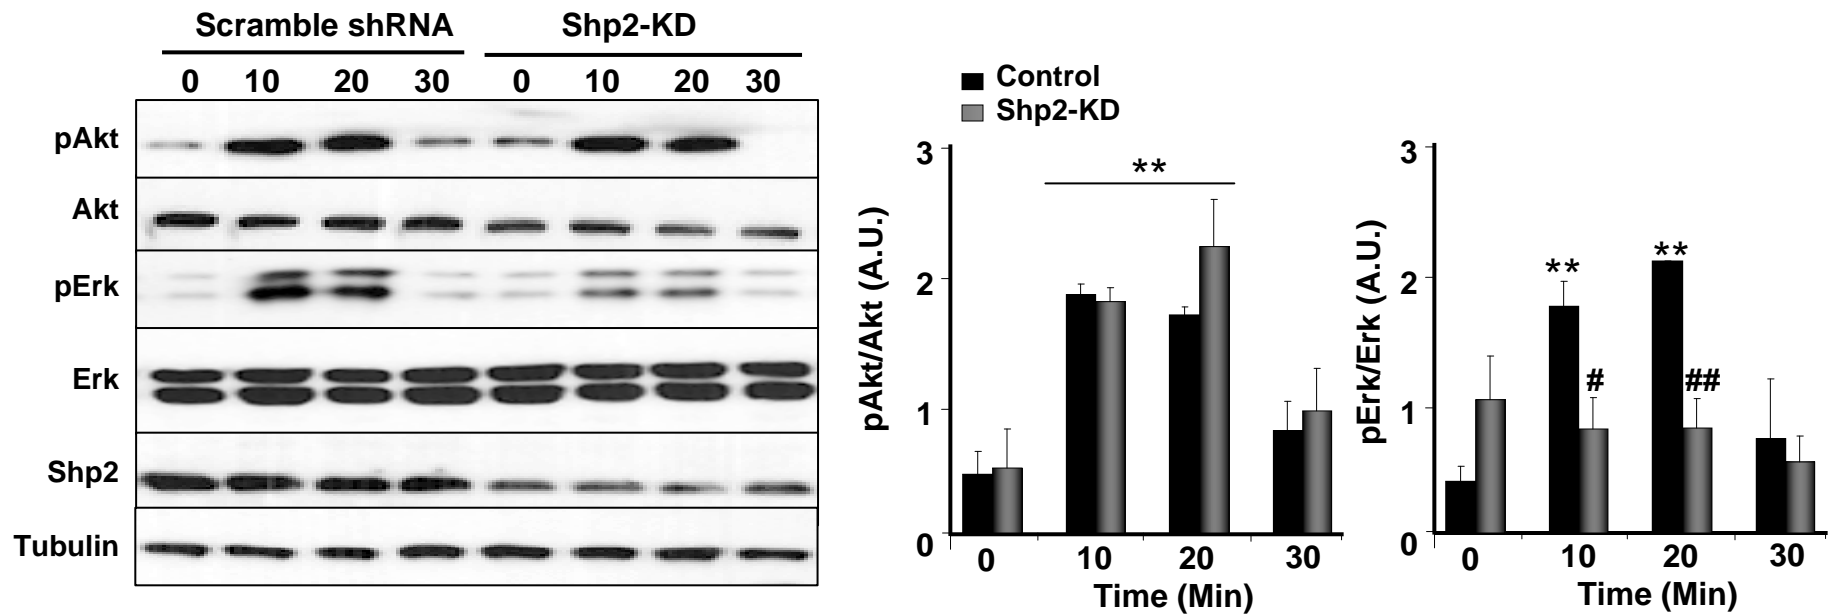

**Fig. S 1: Effects of Shp2 knockdown in 3T3L1 cells on Akt and Erk phosphorylation.** 3T3L1 cell lines with Shp2 knockdown (KD) and control (scrambled shRNA) were generated. Cells were starved O/N then stimulated with insulin (100nM) for 10, 20 and 30 minutes. Total cell lysates were immunoblotted for pAkt, Akt, pErk, Erk, Shp2 and Tubulin (as a control for loading). Bar graphs represent normalized data for pAkt/Akt and pMAPK/MAPK from two independent experiments and presented as means  $\pm$  SEM. Statistical analysis was performed using two-tailed Student's *t*-test. (\*) indicates significant difference between starved and insulin-stimulated cells, while (#) indicates significant difference between WT and Shp2 KD cells.

**A**

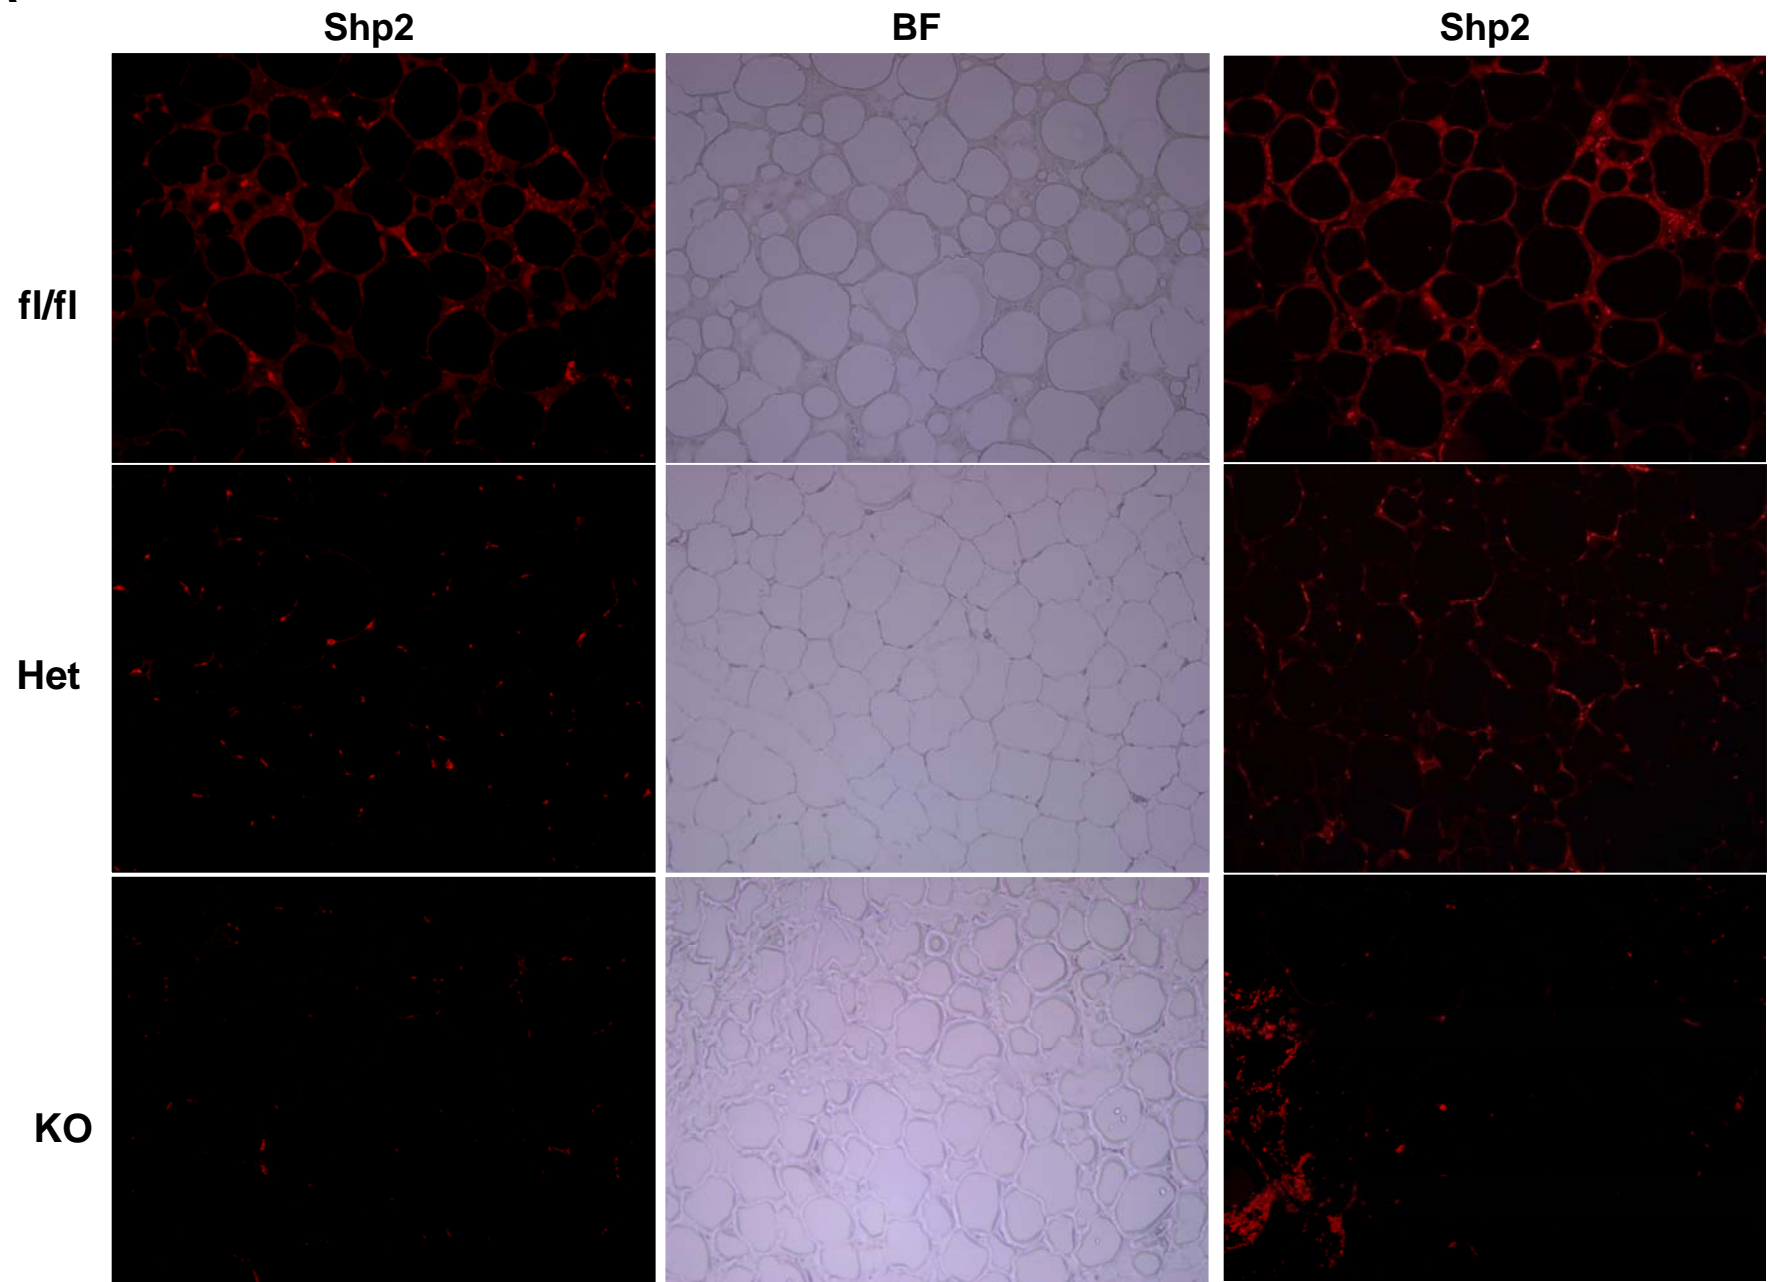

**B**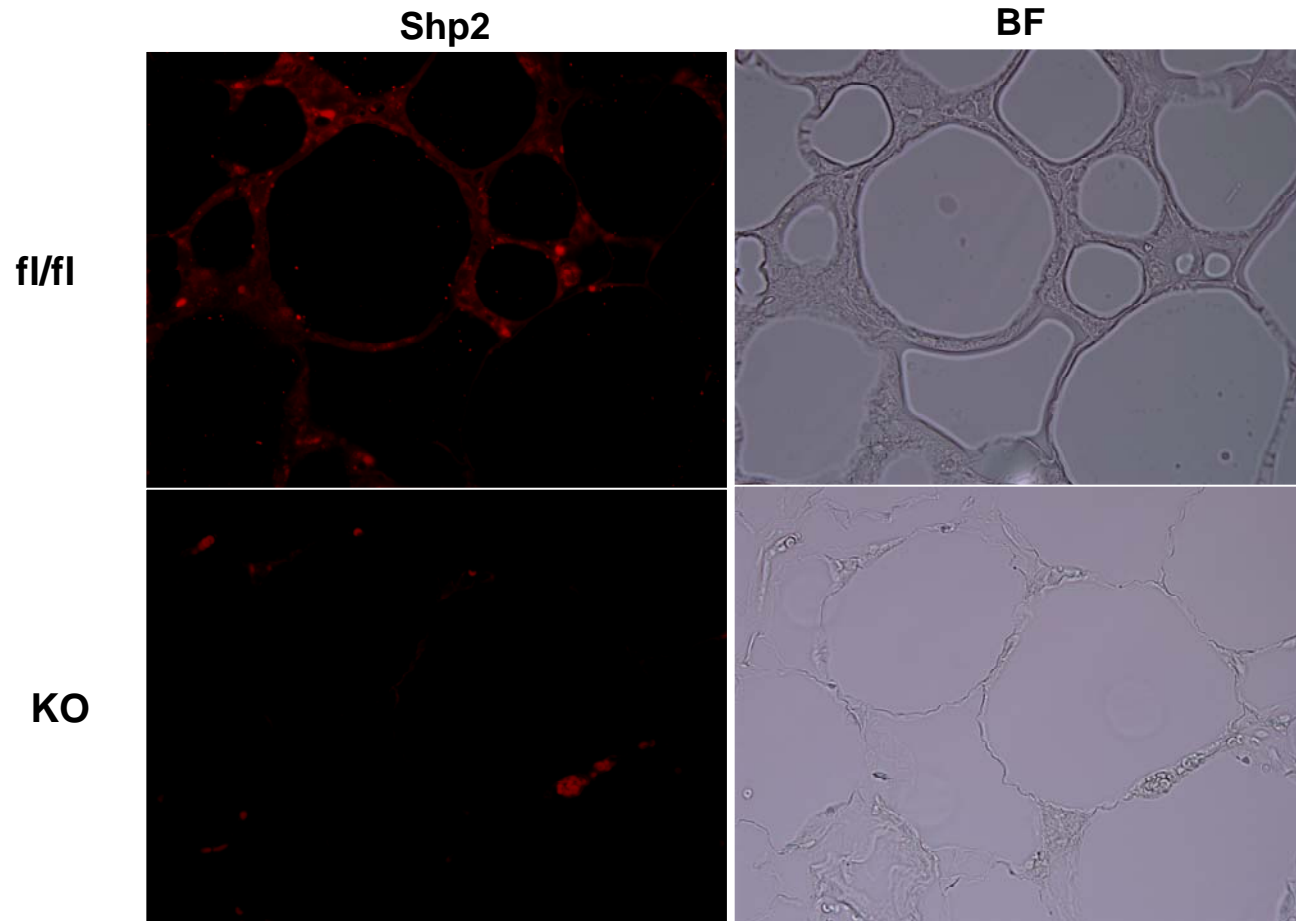

**Fig. S2: Immuno-staining of Shp2 in epididymal adipose tissue.** (A) Representative images of Shp2 immunofluorescence in fl/fl (control), fl/+, Cre (heterozygous) and fl/fl, Cre (FSHKO) mice. The middle lane represents brightfield (BF) images of sections in the first lane. The experiment was repeated another day on different set of mice revealing comparable staining pattern (right lane). Please note that staining in KO sections likely reflects Shp2 expression in other cell types in the adipose tissue, such as vascular endothelial cells and macrophages. Differences in Shp2 staining in heterozygous mice reflects differences between mice. (B) Higher magnification of Shp2 staining in control and FSHKO mice.

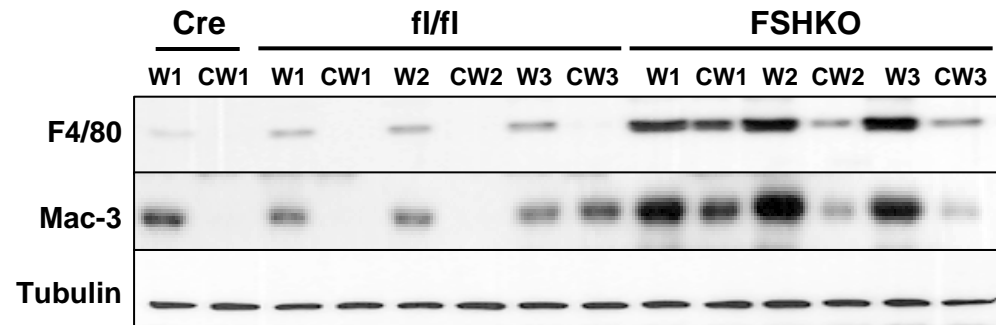

**Fig. S3: Expression of macrophage markers in W and CW fractions of FSHKO mice.** Immunoblots of F4/80 (a mouse macrophage-specific membrane marker) expression in lysates of white adipose tissue (W) and purified adipocytes from collagenase-treated white adipose tissue (CW) from Adipoq-Cre (Cre), *Shp2<sup>flx/flx</sup>* (fl/fl) and Adipoq-*Shp2<sup>flx/flx</sup>* (FSHKO) mice on a HFD for 12 weeks. Blots were also probed with another macrophage marker Mac-3 (although it is presumably less specific as suggested by Inoue, *et al.*, *Kidney International*, 2005). Blots were probed with anti-Tubulin antibodies (bottom panel) as a loading control. The numbers on each lane reflect samples from different mice (W1 and CW1 are from the same mouse; W2 and CW2 are from a different mouse). Notably, FSHKO lysates exhibit increased expression of macrophage markers. This is consistent with our preliminary data suggesting increased inflammation in FSHKO adipose tissue (and presumably increased macrophage infiltration).

1 **Adipose-Specific Deletion of Src Homology Phosphatase 2 does not Significantly**  
2 **Alter Systemic Glucose Homeostasis**

3

4 Ahmed Bettaieb<sup>1</sup>, Kosuke Matsuo<sup>1</sup>, Izumi Matsuo<sup>1</sup>, Naoto Nagata<sup>1</sup>, Samah Chahed<sup>1</sup>,

5 Siming Liu<sup>1</sup>, and Fawaz G. Haj<sup>1\*</sup>

6

7 <sup>1</sup> University of California Davis, Nutrition Department, Davis, CA 95616

8

9 \* Corresponding author: Fawaz G. Haj, D.Phil. University of California Davis, 3135

10 Meyer Hall, Davis, CA 95616, Fax: (530) 753-8966, Tel: (530) 752-3214, E-mail:

11 fghaj@ucdavis.edu

12

13 Page Heading: Adipose Shp2 and Glucose Homeostasis

14

15 Word count of text: 3072

16 Word count of abstract: 184

17 Number of references: 39

18 Number of tables: 1

19 Number of figures: 3

20

21 The authors declare no conflict of interest

22 **ABSTRACT**

23 **Objective** - The SH2 domain-containing protein-tyrosine phosphatase Shp2 has been  
24 implicated in a variety of growth factor signaling pathways, but its metabolic role in

Deleted: physiological function

25 some peripheral insulin-responsive tissues remains unknown. **Materials/Methods** - To  
26 address the metabolic function of Shp2 in adipose tissue, we generated mice with

Deleted: role

27 adipose-specific Shp2 deletion using Adiponectin (Adipoq)-Cre transgenic mice. We  
28 then analyzed insulin sensitivity, glucose tolerance and body mass in adipose-specific

29 Shp2-deficient and control mice on regular chow and high fat diet (HFD). **Results** -

Deleted: -

Deleted: -

30 Control mice on a HFD exhibited increased Shp2 expression in various adipose depots

31 compared with those on regular chow. Adipoq-Cre mice enabled efficient and specific

Deleted: Shp2 protein expression was elevated in various adipose depots of control mice on a HFD compared with those on chow

32 deletion of Shp2 in adipose tissue. However, adipose Shp2 deletion did not significantly  
33 alter body mass in mice on chow or HFD. In addition, mice with adipose Shp2 deletion

Deleted: a

34 exhibited comparable insulin sensitivity and glucose tolerance compared with controls.

35 Consistent with this, basal and insulin-stimulated Erk and Akt phosphorylation were

Deleted: observation

36 comparable in adipose tissue of Shp2-deficient and control mice. **Conclusions** - Our

37 findings indicate that adipose-specific Shp2 deletion does not significantly alter systemic

38 insulin sensitivity and glucose homeostasis.

39

40 **Keywords:** Protein-tyrosine phosphatases, diabetes, glucose homeostasis, body weight,  
41 and adiposity

42

43 **Abbreviations:** Shp2; Src homology phosphatase 2, PTP; protein-tyrosine phosphatase,

44 ITT; insulin tolerance test, and GTT; glucose tolerance test

45 **INTRODUCTION**

46 Metabolic syndrome and type 2 diabetes are complex disorders that are associated  
 47 with obesity and sedentary life style [1, 2]. The increasing incidence of obesity  
 48 worldwide has focused attention on adipose tissue function and contribution to whole  
 49 body metabolic homeostasis. White adipose tissue (WAT) is specialized in lipid storage  
 50 and adipokine secretion and is a regulator of energy balance and systemic insulin  
 51 sensitivity [3].

52 Tyrosyl phosphorylation is a major regulator of insulin signaling and is tightly  
 53 controlled by the opposing actions of protein-tyrosine kinases (PTKs) and protein-  
 54 tyrosine phosphatases (PTPs) [4]. Src homology phosphatase 2 (Shp2) is a ubiquitously  
 55 expressed non-transmembrane protein-tyrosine phosphatase that contains two SH2  
 56 domains, a tyrosine phosphatase domain, a C-terminal region with phosphorylation sites  
 57 and a proline-rich domain [5]. Multiple studies indicate that Shp2 plays an essential role  
 58 in most receptor tyrosine kinase signaling pathways [6, 7]. However, its function in  
 59 regulating glucose homeostasis and energy balance *in vivo* requires additional  
 60 investigation.

**Deleted:** , where it is required for normal activation of the Erk pathway

**Deleted:** While multiple studies have addressed the potential role of Shp2 in regulating insulin signaling and glucose homeostasis, its overall function in this pathway in some insulin-responsive tissues remains unresolved.

61 *In vivo* studies have not completely resolved the physiological role of Shp2 in  
 62 insulin signaling and glucose homeostasis. Targeted mutation of Shp2 exon 3 in mice  
 63 leads to embryonic lethality [8], precluding detailed studies of the effects of global Shp2  
 64 deletion. Hemizygous mice are viable but do not manifest any apparent defects in insulin  
 65 action [9]. On the other hand, transgenic mice that express a presumptive dominant  
 66 negative mutant of Shp2 in skeletal muscle, liver and adipose tissue exhibit insulin  
 67 resistance and impaired insulin-stimulated glucose uptake [10]. Shp2 deletion in striated

68 and cardiac muscle results in insulin resistance, impaired glucose uptake in muscle cells,  
 69 and glucose intolerance [11], although these mice also exhibit marked dilated  
 70 cardiomyopathy [11, 12]. In addition, Shp2 deletion in the pancreas causes defective  
 71 glucose-stimulated insulin secretion and impaired glucose tolerance [13]. Moreover, we  
 72 recently reported that mice lacking Shp2 in the liver exhibit increased hepatic insulin  
 73 action and enhanced systemic insulin sensitivity [14]. However, the role of adipose Shp2  
 74 in regulating insulin sensitivity and glucose homeostasis in vivo remains unknown.

75 Shp2 also is implicated in regulating adiposity, body mass and leptin signaling  
 76 (reviewed in [15, 16]). *In vitro* biochemical studies identify Shp2 as a positive mediator  
 77 of leptin signaling through regulating tyrosine 985 site of leptin receptor [17-19]. These  
 78 findings are supported by *in vivo* deletion of Shp2 in postmitotic forebrain neurons with  
 79 the mice developing early onset obesity and leptin resistance [20]. In addition, mice with  
 80 proopiomelanocortin (POMC) neuron-specific Shp2 deletion exhibit elevated adiposity,  
 81 decreased leptin sensitivity and reduced energy expenditure [21]. Together, these studies  
 82 demonstrate a role for Shp2 in regulating energy balance, at least in part, through  
 83 modulating leptin signaling.

84 In this study we assessed the physiological effects of Shp2 in adipose tissue using  
 85 tissue-specific knockout approach. We determined the metabolic effects of adipose Shp2  
 86 deletion on body mass, systemic insulin sensitivity and glucose homeostasis in chow and  
 87 high fat diet-fed mice.

Deleted: T

Deleted: in the adipose tissue

Deleted:

Deleted: leptin signaling,

Deleted: and

Deleted: (CaSKO mice)

Deleted: . mice develop early onset obesity and leptin resistance.



88 **METHODS**

89 **Mouse studies.** Shp2-floxed (Shp2<sup>fl/fl</sup>) mice were generated previously [22].

90 Adiponectin (Adipoq)-Cre mice were generated and kindly provided by Dr. E. Rosen

91 (BIDMC/Harvard University). Shp2<sup>fl/fl</sup> mice were on a mixed 129Sv/J x C57Bl/6J

Deleted: (unpublished)

92 background and Adipoq-Cre mice were on a mixed FVB x C57Bl/6J background. All

93 mice studied were age-matched and were maintained on a 12-hour light-dark cycle with

94 free access to water and food. Mice were placed on standard lab chow (Purina lab chow,

95 # 5001) and in some experiments, switched to a high fat diet (HFD; 60% kcal from fat, #

Deleted: at weaning

96 D12492, Research Diets) at weaning. Genotyping for the Shp2 floxed allele and for the

97 presence of Cre was performed by polymerase chain reaction (PCR), using DNA

98 extracted from tails [14]. Mouse studies were conducted in line with federal regulations

99 and were approved by the Institutional Animal Care and Use Committee at University of

100 California Davis.

101

102 **Metabolic measurements.** Glucose was measured in blood collected from the tail using

103 a glucometer (Home Aide Diagnostics). Serum insulin was determined by enzyme linked

104 immunosorbent assay (ELISA) using mouse insulin as a standard (Crystal Chem). Serum

105 leptin was assayed by ELISA using rat leptin standard (Crystal Chem). Free fatty acid

106 (FFA) and triglyceride (TG) concentrations were measured by an enzymatic colorimetric

107 method (Wako). Fed glucose measurements were taken between 7-9 am and, where

108 indicated, from mice fasted for 12 hrs. For insulin tolerance tests (ITTs), mice were

109 fasted for 4 hrs and injected intraperitoneally (i.p.) with 1 mU/g body weight human

110 insulin (HumulinR; Eli Lilly). Blood glucose values were measured before and at 15, 30,

111 45, 60, 90 and 120 min post-injection. For glucose tolerance tests (GTTs), overnight-  
112 fasted mice were injected with 20% D-glucose at 2 mg/g body weight, and glucose was  
113 measured before and at 30, 60, 90 and 120 min following injection.

114

115 **Isolation of adipocytes.** Three grams of adipose tissue were incubated at 37°C for 60  
116 minutes in siliconized tubes containing 20 ml isolation buffer {0.1 M HEPES, pH 7.4,  
117 0.12 M NaCl, 0.05 M KCl, 1.2 mM CaCl<sub>2</sub>, 0.6 mM, MgSO<sub>4</sub>.7H<sub>2</sub>O and 1.5% (w/v) bovine  
118 serum albumin Fraction V (Fisher)} containing 0.002% (w/v) collagenase (Worthington).  
119 Tissue remnants were removed by filtration through a nylon screen (pore size 250 µm)  
120 (Tetko) into a siliconized tube. Adipocytes were allowed to float to the surface for 5 min  
121 whereafter the infranatant was aspirated through a siliconized injection needle. Further  
122 purification of adipocytes was performed by adding 5 ml isolation buffer and 2 ml  
123 dinonylphthalate oil (Fluka). Cells were allowed to float to the surface by centrifugation  
124 at 1,000g for 5 min. The supernatant was transferred to Eppendorf tubes and cells were  
125 pelleted and lysed in radio-immunoprecipitation assay (RIPA) buffer (150 mM NaCl,  
126 1.0% IGEPAL® CA-630, 0.5% sodium deoxycholate, 0.1% SDS, and 50 mM Tris, pH  
127 7.4 and I add 5 mM EDTA, 1 mM NaF, 1 mM sodium orthovanadate and protease  
128 inhibitors)

129

130 **Biochemical analyses.** For insulin signaling experiments, 30 week-old male mice were  
131 fasted overnight, injected i.p. with insulin (10 mU/g body weight), and sacrificed 10  
132 minutes after injection. Tissues were ground in liquid nitrogen and lysed using RIPA  
133 buffer. Lysates were clarified by centrifugation at 13,000 rpm for 10 min and protein

**Deleted:** Tissues were dissected and immediately frozen in liquid nitrogen.

134 concentrations were determined using bicinchoninic acid protein assay kit (Pierce  
135 Chemical). Proteins were resolved by SDS-PAGE and transferred to PVDF membranes.  
136 Immunoblotting of lysates was performed with antibodies for Shp2 (Santa Cruz;  
137 1/10,000), PTP1B (Millipore; 1/5,000), TCPTP (Mediamab; 1/2,000), pAkt (1/5,000),  
138 Akt (1/5,000), pErk (1/10,000), Erk (1/10,000) (all from Cell Signaling) and Tubulin  
139 (Santa Cruz; 1/5,000). Proteins were visualized using enhanced chemiluminescence  
140 (ECL, Amersham Biosciences) and pixel intensities of immuno-reactive bands were  
141 quantified using FluorChem 8900 (Alpha Innotech).

Deleted: s were

142  
143 **Statistical analyses.** Data are expressed as means  $\pm$  standard error of the mean (SEM).  
144 Statistical analyses were performed using the JMP program (SAS Institute). ITTs, GTTs,  
145 body weight and adiposity data were analyzed by analysis of variance (ANOVA). Post-  
146 hoc analysis was performed using Tukey-Kramer honestly significant difference test. For  
147 biochemistry studies, comparisons between groups were performed using unpaired two-  
148 tailed Student's *t* test.

Deleted: Comparisons between groups were made by unpaired two-tailed Student's *t* test. ITTs and GTTs were analyzed by repeated measures analysis of variance (ANOVA). Post-hoc analysis was performed using Tukey-Kramer honestly significant difference test.  
=====Section Break (Next Page)=====

151  
152  
153  
154  
155  
156

157 **RESULTS**

158 **Generation of adipose-specific Shp2 knockout mice.** To investigate the role of adipose  
 159 Shp2 in regulating body mass and glucose homeostasis, we assessed the physiological  
 160 effects of its deletion in adipose tissue using Cre-LoxP approach. Mice with adipose-  
 161 specific Shp2 deletion were generated by crossing Shp2<sup>fl/fl</sup> (fl/fl) mice to BAC transgenic  
 162 mice expressing Cre recombinase under the control of the Adiponectin locus (Adipoq-  
 163 Cre) to generate Adipoq-Shp2<sup>fl/+</sup> mice. These mice were crossed to Shp2<sup>fl/fl</sup>, yielding  
 164 Adipoq-Shp2<sup>fl/fl</sup> (hereafter termed fat-specific Shp2 KO; FSHKO). FSHKO mice  
 165 survived to adulthood, and were fertile. Efficiency of Shp2 deletion was determined  
 166 using immunoblot analysis of lysates from whole white adipose tissue (W) and purified  
 167 adipocytes from collagenase-treated white adipose tissue (CW) (Fig. 1A, B). Shp2  
 168 protein expression was comparable between Cre and fl/fl mice in white adipose tissue  
 169 and purified adipocytes. On the other hand, FSHKO mice exhibited decreased Shp2  
 170 expression by ~70% in white adipose (W) and ~85% in collagenase-treated white adipose  
 171 (CW) compared with controls (Fig. 1B). These findings are consistent with complete  
 172 deletion of Shp2 in adipocytes; the residual Shp2 in FSHKO white adipose (W) lysates  
 173 likely reflects Shp2 expression in other cell types in the adipose tissue, such as vascular  
 174 endothelial cells and macrophages. Indeed, immuno-staining of Shp2 in WAT sections  
 175 of FSHKO and control mice supports this notion (data not shown). Shp2 levels were  
 176 unchanged in other peripheral insulin-responsive tissues (liver and muscle), pancreas,  
 177 brain and macrophages confirming the specificity of deletion (Fig. 1C, D). The  
 178 expression of other PTPs known to regulate glucose homeostasis, protein-tyrosine  
 179 phosphatase 1B (PTP1B) [23, 24] and its closely related T cell protein-tyrosine

Deleted: mice with

Deleted: deletion of

Deleted: physiological

Deleted: determined

Deleted: levels were

Deleted: was significantly decreased

Deleted: in FSHKO mice compared with controls

Deleted: about

Deleted: in white adipose tissue

Deleted: unpurified adipocytes, respectively

Deleted: Heterozygous mice expressed about 55% Shp2 compared with controls in collagenase-treated white adipose (data not shown).

Deleted: protein

Deleted: E

180 phosphatase (TCPTP) [25, 26] was unaltered in FSHKO mice (Fig. 1C). In addition,  
 181 ~~Shp2 deletion~~ also was observed in adipose tissue of old (60 weeks) FSHKO mice on  
 182 regular chow (Fig. 1D). ~~Therefore,~~ this approach enables efficient and specific deletion of  
 183 Shp2 in adipose tissue.

Deleted: comparable level of

Deleted: Taken together, our findings indicate that

184

#### 185 **Adipose-specific Shp2 deletion does not significantly alter body mass or adiposity.**

186 Shp2 protein expression, was determined in various adipose depots of control mice fed  
 187 regular chow or HFD (for 12 weeks). Immunoblot analysis of lysates revealed that Shp2  
 188 was expressed in subcutaneous (SubQ), epididymal (Epi), retroperitoneal (Ret), visceral  
 189 (Vis) and brown adipose tissue (BAT) depots of mice fed regular chow (Fig. 2A).

Deleted: To evaluate the effect of adipose Shp2 deletion on body mass regulation, mice were fed regular chow or challenged with a high fat diet. Initially, we determined

Deleted: of Shp2

Deleted: from whole adipose tissues depots

Deleted: in

190 Notably, mice fed a HFD exhibited significantly increased Shp2 expression in all  
 191 examined adipose depots compared with those fed regular chow (Fig. 2A, B). Next, we  
 192 evaluated the effect of adipose Shp2 deletion on body mass and adiposity in mice fed

Deleted: mice

Deleted: on

193 regular chow or challenged with a HFD. As expected, on HFD mice gained more weight  
 194 than their counterparts on regular chow, but comparable body weights (females and  
 195 males) were detected between genotypes on either diet (Fig. 2C-F). Similar data were  
 196 obtained in another independent cohort of mice on a HFD for 24 weeks (data not shown).

Deleted: in

197 In line with this observation, white adipose tissue weight was similar in FSHKO mice  
 198 compared with controls on a HFD in both genders (Fig. 2G, J). In addition, adiposity  
 199 index (total adipose depot weight (g) ÷ body weight (g) × 100), which correlates strongly  
 200 with body fat percentage [27], was comparable between genotypes (Fig. 2H, K). Similar  
 201 head-rump length was also observed in mice of different genotypes (Fig. 2I, L).

202 Moreover, we assayed several parameters of whole-body lipid homeostasis. Leptin is a

203 cytokine that is produced by adipocytes and its levels typically reflect body fat content  
 204 with lean animals normally having low serum leptin [28, 29]. Consistent with their  
 205 comparable adiposity and body weight, FSHKO mice exhibited similar fasted serum  
 206 leptin concentrations compared with controls (Table 1). Furthermore, fasted serum  
 207 triglyceride and free fatty acid concentrations were comparable between FSHKO and  
 208 controls. Together, our data indicate that adipose Shp2 protein expression increases after  
 209 high fat feeding but its deletion does not significantly alter adiposity and body weight  
 210 under the tested conditions.

Deleted: (Table 1)

211

212 **Adipose-specific Shp2 deletion does not significantly alter systemic glucose**

213 **homesotasis.** Body weights of control and FSHKO mice on regular chow and HFD were  
 214 comparable suggesting that any potential differences in glucose homeostasis are primary  
 215 and not caused by body weight alterations. We assayed several metabolic parameters in  
 216 control and FSHKO mice on a HFD (Table 1). FSHKO mice exhibited comparable fed  
 217 and fasted glucose and insulin concentrations compared with controls. In addition,  
 218 insulin/glucose ratio was comparable between genotypes. To directly evaluate insulin  
 219 sensitivity *in vivo*, male and female mice on regular chow and a HFD were subjected to  
 220 ITTs at 14 weeks of age (Fig. 3A-D). On either diet, FSHKO mice exhibited comparable  
 221 insulin sensitivity to controls. In addition, we tested the ability of mice to clear glucose  
 222 from the peripheral circulation during intraperitoneal GTTs (Fig. 3E-H). Similarly,  
 223 FSHKO mice exhibited comparable glucose tolerance to controls on either diet.  
 224 Additional ITTs and GTTs were performed in another independent cohort of mice on a  
 225 HFD (for 24 weeks) revealing comparable results (data not show). Next, we evaluated

Deleted: Comparable glucose homeostasis in FSHKO and control mice. ¶

Deleted: fed and fasted

Deleted: to

Deleted: assess

Deleted:

Deleted: s

226 phosphorylation of Akt (Ser473) and Erk in control and FSHKO mice on a HFD at basal  
227 and insulin-stimulated (10 min) conditions (Fig. 3I, J). As expected, insulin induced  
228 significant Akt (Ser473) and Erk phosphorylation in adipose tissue of FSHKO and  
229 control mice. FSHKO mice exhibited a trend for decreased insulin-induced Akt  
230 phosphorylation, but it did not reach statistical significance (P=0.4). In addition, no  
231 significant differences were observed in insulin-induced Erk phosphorylation in FSHKO  
232 and control mice (P=0.5) (Fig. 3J). Collectively, our data indicate that adipose Shp2  
233 deletion does not significantly alter systemic insulin sensitivity and glucose tolerance.

234 **DISCUSSION**

235 The role of Shp2 in regulating glucose homeostasis, as well as its specific  
236 functions in adipose tissue, has heretofore remained largely unresolved. To begin to  
237 address these issues, we generated mice with adipose-specific Shp2 deletion using the  
238 novel Adipoq-Cre transgenic mice. These mice might provide some advantages  
239 compared with the commonly-used fatty acid binding protein 2 (aP2)-Cre mice that have  
240 been utilized for adipose-specific deletion. Although aP2 is predominantly expressed in  
241 adipocytes postnatally [30], it is also expressed in non-adipose tissues (such as trigeminal  
242 ganglia, dorsal root ganglia and vertebrae) during development [31]. In addition, aP2 is  
243 expressed in activated macrophages [32], which are implicated in the regulation of  
244 adipose tissue inflammation and function [33, 34]. On the other hand, Adipoq-Cre mice  
245 do not express Cre in bone marrow-derived macrophages (Fig. 1). Although additional  
246 studies are required to fully evaluate the utility of Adipoq-Cre mice; they enabled  
247 efficient and specific deletion of Shp2 in various adipose depots.

248 Our studies demonstrated that Shp2 expression was dynamically regulated in  
249 adipose tissue depots of mice on a HFD. The regulatory point(s) for adipose Shp2  
250 abundance in response to high fat feeding remains to be determined, and could be  
251 attributed to increased expression and/or pretranslational alterations (involving mRNA  
252 stability or gene transcription). Number of factors can contribute to increased adipose  
253 Shp2 expression including, but not limited to, insulin resistance. Of note, Shp2 (and  
254 PTP1B) expression and activity are increased in liver and muscle of diabetic rats [35]. In  
255 addition, improved insulin sensitivity in obese subjects following weight loss is  
256 accompanied by decreased PTP1B expression and activity in adipose tissue [36]. Thus,

Deleted: the

Deleted: with adipocyte-specific Cre expression

Deleted: Adipoq-Cre

Deleted: transgenic

Deleted: In addition to its expression in adipose tissue,

Deleted: are known to regulate

Deleted: However,

Deleted: mice

Deleted: compared with aP2-Cre to achieve efficient and specific adipose deletion. At any rate, Adipoq-Cre mice

Deleted: different

Deleted: and provided a useful tool to achieve adipose-specific deletion

Deleted: data

Deleted: in adipose depots

Deleted: after

Deleted: HFD



257 in subjects with insulin resistance, reduction of the elevated PTP activity (in one or more  
 258 tissue) could potentially reduce the risk of developing diabetes and may have beneficial  
 259 metabolic effects. Additional factors can contribute to increased PTP expression *in vivo*.  
 260 Zabolotny *et al.* report that inflammation underlies PTP1B over-expression in diabetes  
 261 and obesity [37]. Given that Shp2 plays a role in TNF receptor and interleukin 6  
 262 signaling [38, 39], inflammatory responses might contribute, at least in part, to the  
 263 regulation of adipose Shp2 expression. Preliminary studies revealed increased  
 264 inflammatory response in adipose tissue of FSHKO mice on a HFD compared with  
 265 controls (Bettaieb and Haj, unpublished observations). Since adipose inflammation  
 266 accompanies obesity in humans [33], additional studies are warranted to address the  
 267 potential role of adipose Shp2 in inflammation and the metabolic implications of such  
 268 regulation.

**Deleted:** At any rate, adipose Shp2 deficiency does not significantly alter insulin sensitivity suggesting that Shp2 over-expression is not regulated simply by obesity or diabetes *per se*.

269 Body weights of control and FSHKO mice on regular chow and HFD were  
 270 comparable indicating that adipose Shp2 deletion did not significantly alter body mass  
 271 under these experimental conditions. In line with this, FSHKO and control mice  
 272 exhibited comparable leptin concentrations. Our findings and previous reports on Shp2  
 273 deletion in muscle [11, 12], suggest that Shp2 deletion in these peripheral insulin-  
 274 responsive tissues does not significantly alter body mass. On the other hand, neuronal  
 275 Shp2 has been identified as a regulator of energy balance and adiposity *in vivo*, at least in  
 276 part, through modulating leptin signaling [20, 21]. Additional studies are required to  
 277 fully assess the effects of adipose Shp2 deficiency on energy balance and adipokine  
 278 secretion under different experimental conditions such as various diets and/or prolonged  
 279 high fat feeding.

**Deleted:** modulate

**Deleted:** adiposity and

**Deleted:** observation

**Deleted:**

**Deleted:** These

**Deleted:** [7, 8] and liver [10]

**Deleted:** regulate

**Deleted:** adiposity

**Deleted:** Thus far,

**Deleted:** rther

**Deleted:** adiposity, leptin (and other adipokines) secretion

**Deleted:** other

280 Shp2 plays diverse roles in peripheral tissues to modulate systemic insulin  
281 sensitivity and glucose homeostasis. Transgenic mice that express a presumptive  
282 dominant negative mutant of Shp2 to varying levels in liver, skeletal muscle and adipose  
283 tissue exhibit insulin resistance, impaired insulin-stimulated glucose uptake and  
284 decreased IRS1 phosphorylation in skeletal muscle and liver [10]. In addition, Shp2  
285 deletion in muscle leads to insulin resistance and glucose intolerance [11]. The dilated  
286 cardiomyopathy that also develops in these mice [11, 12] could lead to secondary  
287 changes in muscle cells that affect insulin sensitivity. However, the similarity between  
288 the muscle-specific KO and transgenic mutant mice suggest that Shp2 is a positive  
289 modulator of insulin signaling in muscle. On the other hand, we recently reported that  
290 mice lacking Shp2 in the liver exhibit increased hepatic insulin action and enhanced  
291 systemic insulin sensitivity, indicating that Shp2 is a negative regulator of insulin  
292 signaling in the liver. Our current findings indicate that adipose-specific Shp2 deletion  
293 does not significantly alter systemic insulin sensitivity and glucose homeostasis.  
294 Consistent with their insulin sensitivity, FSHKO and control mice exhibited comparable  
295 Akt and Erk phosphorylation. However, we cannot exclude alterations in Akt and/or Erk  
296 signaling at later times post stimulation. The mechanism(s) through which Shp2 plays  
297 distinct roles in individual peripheral insulin-responsive tissues remains unclear.  
298 Conceivably, Shp2 has distinct substrates in different tissues. Alternatively, Shp2 may  
299 affect the same pathways in different tissues, but the effects of those pathways and/or the  
300 feedback regulatory pathways may differ in a tissue-specific manner. At any rate, these  
301 studies highlight the need to dissect the tissue-specific roles of Shp2.

302 In summary, our studies indicated that adipose Shp2 deletion did not significantly  
303 alter body mass and systemic glucose homeostasis. It would be of interest to examine if  
304 enhanced/prolonged metabolic challenge(s) will lead to the manifestation of metabolic  
305 alterations in FSHKO mice. Finally, we do not exclude other biologically relevant  
306 effects of adipose Shp2 deletion such as nonshivering thermogenesis, endoplasmic  
307 reticulum stress, adipokine secretion and inflammation. Indeed, Shp2 plays a role in TNF  
308 receptor and interleukin 6 signaling, thus it will be important to explore these and other  
309 signaling systems, in FSHKO mice.

**Deleted:** While our data argue against a significant effect of adipose Shp2 deficiency on body mass and glucose homeostasis, we cannot rule out potential effects under alternative conditions such as prolonged periods of high fat feeding and/or feeding a HFD with different nutrient composition.

**Deleted:** In addition

310

### 311 **ACKNOWLEDGMENTS**

312 We thank Drs. Benjamin Neel (Ontario Cancer Institute) and Evan Rosen  
313 (BIDMC/Harvard University) for Shp2<sup>fl/fl</sup> and Adipoq-Cre mice, respectively. We thank  
314 members of the laboratory for critical comments on the manuscript.

315

### 316 **FUNDING**

317 This work was supported in part by grant from Center for Health and Nutrition Research,  
318 Junior Faculty Award from the American Diabetes Association (7-06-JF-28), Research  
319 Grant from the Juvenile Diabetes Research Foundation (1-2009-337) and NIH grant  
320 R56DK084317 to F.G.H.

321

### 322 **DISCLOSURE STATEMENT**

323 The authors declare no conflict of interest

324

325 **AUTHOR CONTRIBUTIONS**

326 A. B., performed research, collected and analyzed data and co-wrote manuscript, K. M.,  
327 performed research, I.M., performed research, N.N., performed research, S.C., performed  
328 research. S.L., performed research, F.G.H., designed study, data interpretation and  
329 manuscript writing.

## REFERENCES

1. Spiegelman, B.M., and Flier, J.S. (2001). Obesity and the regulation of energy balance. *Cell* 104, 531-543.
2. Biddinger, S.B., and Kahn, C.R. (2006). From mice to men: insights into the insulin resistance syndromes. *Annual review of physiology* 68, 123-158.
3. Rosen, E.D., and Spiegelman, B.M. (2006). Adipocytes as regulators of energy balance and glucose homeostasis. *Nature* 444, 847-853.
4. Tonks, N.K. (2006). Protein tyrosine phosphatases: from genes, to function, to disease. *Nat Rev Mol Cell Biol* 7, 833-846.
5. Sugimoto, S., Lechleider, R.J., Shoelson, S.E., Neel, B.G., and Walsh, C.T. (1993). Expression, purification, and characterization of SH2-containing protein tyrosine phosphatase, SH-PTP2. *The Journal of biological chemistry* 268, 22771-22776.
6. Feng, G.S. (2007). Shp2-mediated molecular signaling in control of embryonic stem cell self-renewal and differentiation. *Cell research* 17, 37-41.
7. Chan, G., Kalaitzidis, D., and Neel, B.G. (2008). The tyrosine phosphatase Shp2 (PTPN11) in cancer. *Cancer metastasis reviews* 27, 179-192.
8. Saxton, T.M., Henkemeyer, M., Gasca, S., Shen, R., Rossi, D.J., Shalaby, F., Feng, G.S., and Pawson, T. (1997). Abnormal mesoderm patterning in mouse embryos mutant for the SH2 tyrosine phosphatase Shp-2. *The EMBO journal* 16, 2352-2364.

9. Arrandale, J.M., Gore-Willse, A., Rocks, S., Ren, J.M., Zhu, J., Davis, A., Livingston, J.N., and Rabin, D.U. (1996). Insulin signaling in mice expressing reduced levels of Syp. *The Journal of biological chemistry* *271*, 21353-21358.
10. Maegawa, H., Hasegawa, M., Sugai, S., Obata, T., Ugi, S., Morino, K., Egawa, K., Fujita, T., Sakamoto, T., Nishio, Y., et al. (1999). Expression of a dominant negative SHP-2 in transgenic mice induces insulin resistance. *The Journal of biological chemistry* *274*, 30236-30243.
11. Princen, F., Bard, E., Sheikh, F., Zhang, S.S., Wang, J., Zago, W.M., Wu, D., Trelles, R.D., Bailly-Maitre, B., Kahn, C.R., et al. (2009). Deletion of Shp2 tyrosine phosphatase in muscle leads to dilated cardiomyopathy, insulin resistance, and premature death. *Molecular and cellular biology* *29*, 378-388.
12. Kontaridis, M.I., Yang, W., Bence, K.K., Cullen, D., Wang, B., Bodyak, N., Ke, Q., Hinek, A., Kang, P.M., Liao, R., et al. (2008). Deletion of Ptpn11 (Shp2) in cardiomyocytes causes dilated cardiomyopathy via effects on the extracellular signal-regulated kinase/mitogen-activated protein kinase and RhoA signaling pathways. *Circulation* *117*, 1423-1435.
13. Zhang, S.S., Hao, E., Yu, J., Liu, W., Wang, J., Levine, F., and Feng, G.S. (2009). Coordinated regulation by Shp2 tyrosine phosphatase of signaling events controlling insulin biosynthesis in pancreatic beta-cells. *Proceedings of the National Academy of Sciences of the United States of America* *106*, 7531-7536.
14. Matsuo, K., Delibegovic, M., Matsuo, I., Nagata, N., Liu, S., Bettaieb, A., Xi, Y., Araki, K., Yang, W., Kahn, B.B., et al (2010). Altered glucose homeostasis in

- mice with liver-specific deletion of Src homology phosphatase 2. *The Journal of biological chemistry* 285, 39750-39758.
15. Neel, B.G., Gu, H., and Pao, L. (2003). The 'Shp'ing news: SH2 domain-containing tyrosine phosphatases in cell signaling. *Trends in biochemical sciences* 28, 284-293.
  16. Feng, G.S. (2006). Shp2 as a therapeutic target for leptin resistance and obesity. *Expert opinion on therapeutic targets* 10, 135-142.
  17. Carpenter, L.R., Farruggella, T.J., Symes, A., Karow, M.L., Yancopoulos, G.D., and Stahl, N. (1998). Enhancing leptin response by preventing SH2-containing phosphatase 2 interaction with Ob receptor. *Proceedings of the National Academy of Sciences of the United States of America* 95, 6061-6066.
  18. Li, C., and Friedman, J.M. (1999). Leptin receptor activation of SH2 domain containing protein tyrosine phosphatase 2 modulates Ob receptor signal transduction. *Proceedings of the National Academy of Sciences of the United States of America* 96, 9677-9682.
  19. Bjorbaek, C., Buchholz, R.M., Davis, S.M., Bates, S.H., Pierroz, D.D., Gu, H., Neel, B.G., Myers, M.G., Jr., and Flier, J.S. (2001). Divergent roles of SHP-2 in ERK activation by leptin receptors. *The Journal of biological chemistry* 276, 4747-4755.
  20. Zhang, E.E., Chapeau, E., Hagihara, K., and Feng, G.S. (2004). Neuronal Shp2 tyrosine phosphatase controls energy balance and metabolism. *Proceedings of the National Academy of Sciences of the United States of America* 101, 16064-16069.

21. Banno, R., Zimmer, D., De Jonghe, B.C., Atienza, M., Rak, K., Yang, W., and Bence, K.K. PTP1B and SHP2 in POMC neurons reciprocally regulate energy balance in mice. *The Journal of clinical investigation* *120*, 720-734.
22. Zhang, S.Q., Yang, W., Kontaridis, M.I., Bivona, T.G., Wen, G., Araki, T., Luo, J., Thompson, J.A., Schraven, B.L., Philips, M.R., et al. (2004). Shp2 regulates SRC family kinase activity and Ras/Erk activation by controlling Csk recruitment. *Molecular cell* *13*, 341-355.
23. Elchebly, M., Payette, P., Michaliszyn, E., Cromlish, W., Collins, S., Loy, A.L., Normandin, D., Cheng, A., Himms-Hagen, J., Chan, C.C., et al. (1999). Increased insulin sensitivity and obesity resistance in mice lacking the protein tyrosine phosphatase-1B gene. *Science* *283*, 1544-1548.
24. Klamann, L.D., Boss, O., Peroni, O.D., Kim, J.K., Martino, J.L., Zabolotny, J.M., Moghal, N., Lubkin, M., Kim, Y.B., Sharpe, A.H., et al. (2000). Increased energy expenditure, decreased adiposity, and tissue-specific insulin sensitivity in protein-tyrosine phosphatase 1B-deficient mice. *Molecular and cellular biology* *20*, 5479-5489.
25. Galic, S., Klingler-Hoffmann, M., Fodero-Tavoletti, M.T., Puryer, M.A., Meng, T.C., Tonks, N.K., and Tiganis, T. (2003). Regulation of insulin receptor signaling by the protein tyrosine phosphatase TCPTP. *Molecular and cellular biology* *23*, 2096-2108.
26. Fukushima, A., Loh, K., Galic, S., Fam, B., Shields, B., Wiede, F., Tremblay, M.L., Watt, M.J., Andrikopoulos, S., and Tiganis, T. T-cell protein tyrosine



- phosphatase attenuates STAT3 and insulin signaling in the liver to regulate gluconeogenesis. *Diabetes* 59, 1906-1914.
27. Chiu, S., Kim, K., Haus, K.A., Espinal, G.M., Millon, L.V., and Warden, C.H. (2007). Identification of positional candidate genes for body weight and adiposity in subcongenic mice. *Physiol Genomics* 31, 75-85.
  28. Havel, P.J. (2004). Update on adipocyte hormones: regulation of energy balance and carbohydrate/lipid metabolism. *Diabetes* 53 *Suppl 1*, S143-151.
  29. Ahima, R.S. (2008). Revisiting leptin's role in obesity and weight loss. *The Journal of clinical investigation* 118, 2380-2383.
  30. Ross, S.R., Graves, R.A., Greenstein, A., Platt, K.A., Shyu, H.L., Mellovitz, B., and Spiegelman, B.M. (1990). A fat-specific enhancer is the primary determinant of gene expression for adipocyte P2 in vivo. *Proceedings of the National Academy of Sciences of the United States of America* 87, 9590-9594.
  31. Urs, S., Harrington, A., Liaw, L., and Small, D. (2006). Selective expression of an aP2/Fatty Acid Binding Protein 4-Cre transgene in non-adipogenic tissues during embryonic development. *Transgenic Res* 15, 647-653.
  32. Makowski, L., Boord, J.B., Maeda, K., Babaev, V.R., Uysal, K.T., Morgan, M.A., Parker, R.A., Suttles, J., Fazio, S., Hotamisligil, G.S., et al. (2001). Lack of macrophage fatty-acid-binding protein aP2 protects mice deficient in apolipoprotein E against atherosclerosis. *Nature medicine* 7, 699-705.
  33. Weisberg, S.P., McCann, D., Desai, M., Rosenbaum, M., Leibel, R.L., and Ferrante, A.W., Jr. (2003). Obesity is associated with macrophage accumulation in adipose tissue. *The Journal of clinical investigation* 112, 1796-1808.

34. Neels, J.G., and Olefsky, J.M. (2006). Inflamed fat: what starts the fire? *The Journal of clinical investigation* 116, 33-35.
35. Ahmad, F., and Goldstein, B.J. (1995). Alterations in specific protein-tyrosine phosphatases accompany insulin resistance of streptozotocin diabetes. *The American journal of physiology* 268, E932-940.
36. Cheung, A., Kusari, J., Jansen, D., Bandyopadhyay, D., Kusari, A., and Bryer-Ash, M. (1999). Marked impairment of protein tyrosine phosphatase 1B activity in adipose tissue of obese subjects with and without type 2 diabetes mellitus. *The Journal of laboratory and clinical medicine* 134, 115-123.
37. Zabolotny, J.M., Kim, Y.B., Welsh, L.A., Kershaw, E.E., Neel, B.G., and Kahn, B.B. (2008). Protein-tyrosine phosphatase 1B expression is induced by inflammation in vivo. *The Journal of biological chemistry* 283, 14230-14241.
38. You, M., Flick, L.M., Yu, D., and Feng, G.S. (2001). Modulation of the nuclear factor kappa B pathway by Shp-2 tyrosine phosphatase in mediating the induction of interleukin (IL)-6 by IL-1 or tumor necrosis factor. *The Journal of experimental medicine* 193, 101-110.
39. Podar, K., Mostoslavsky, G., Sattler, M., Tai, Y.T., Hayashi, T., Catley, L.P., Hideshima, T., Mulligan, R.C., Chauhan, D., and Anderson, K.C. (2004). Critical role for hematopoietic cell kinase (Hck)-mediated phosphorylation of Gab1 and Gab2 docking proteins in interleukin 6-induced proliferation and survival of multiple myeloma cells. *The Journal of biological chemistry* 279, 21658-21665.

| <b>Genotype</b>                            | <b>flx/flx</b> | <b>FSHKO</b> | <b>Cre</b>   |
|--------------------------------------------|----------------|--------------|--------------|
| <b>Metabolic parameters</b>                |                |              |              |
| <b>Glucose (mg/dl)</b><br><b>Fed</b>       | 178 ± 14       | 197 ± 19     | 175 ± 13     |
| <b>Fasted</b>                              | 128 ± 10       | 139 ± 5      | 129 ± 9      |
| <b>Insulin (ng/ml)</b><br><b>Fed</b>       | 10.5 ± 1.6     | 11.2 ± 1.2   | 10.7 ± 1.7   |
| <b>Fasted</b>                              | 3.2 ± 0.6      | 2.6 ± 0.5    | 2.9 ± 0.5    |
| <b>Insulin/Glucose ratio</b><br><b>Fed</b> | 0.05 ± 0.01    | 0.06 ± 0.02  | 0.06 ± 0.01  |
| <b>Fasted</b>                              | 0.025 ± 0.01   | 0.018 ± 0.01 | 0.022 ± 0.02 |
| <b>Leptin (ng/ml)</b><br><b>Fasted</b>     | 8.16 ± 0.62    | 8.96 ± 1.90  | 9.71 ± 1.10  |
| <b>TG (mg/dl)</b><br><b>Fasted</b>         | 15.9 ± 1.6     | 13.4 ± 0.8   | 18.3 ± 4.6*  |
| <b>FFA (mM)</b><br><b>Fasted</b>           | 1.86 ± 0.3     | 1.41 ± 0.2   | 1.45 ± 0.2   |

423 **Table 1: Metabolic variables in mice with adipose-specific Shp2 deletion.** Male  
424 flx/flx, FSHKO and Cre mice were fed a HFD upon weaning. Serum was collected from  
425 fed or fasted mice at 10 weeks of age (6 weeks on HFD) and the indicated metabolic  
426 parameters were measured. Values are expressed as the mean  $\pm$  SEM of measurements  
427 obtained for 6-8 animals per genotype. \* indicates statistically significant difference  
428 between Cre and FSHKO.

429 **FIGURE LEGENDS**

430

431 **Figure 1: Adipose-specific Shp2 deletion.** (A) Immunoblots of Shp2 expression in  
432 lysates of white adipose tissue (W) and purified adipocytes from collagenase-treated  
433 white adipose tissue (CW) from Adipoq-Cre (Cre), Shp2<sup>flx/flx</sup> (fl/fl) and Adipoq-Shp2<sup>flx/flx</sup>  
434 (FSHKO) mice on a HFD for 12 weeks. Blots were probed with anti-Tubulin antibodies  
435 (bottom panel) as a loading control. Numbers reflect samples from different mice (W1  
436 and CW1 are from the same mouse; W2 and CW2 are from a different mouse). (B)

Deleted: Shp2 deletion efficiency was evaluated in

Deleted: Lysates were blotted

Deleted: for

Deleted:

437 Quantitative determination of Shp2 protein expression (normalized to Tubulin) from six  
438 mice per genotype. Note that compared with control mice, adipose Shp2 protein  
439 expression was decreased by ~70% and 85% in W and CW, respectively. (C) Shp2  
440 protein expression in lysates from white adipose tissue, collagenase-treated white adipose  
441 tissue, brown adipose tissue (BAT), liver (L), muscle (M), pancreas (P) and brain (Br).  
442 Blots were probed for PTP1B, TCPTP and Tubulin. (D) Shp2 expression in W, CW and  
443 bone marrow-derived macrophages (Mac) from mice on regular chow for 60 weeks. \*\*  
444 Indicates statistically significant difference ( $P \leq 0.01$ ) between FSHKO and fl/fl mice.

445

446 **Figure 2: Effects of adipose-specific Shp2 deletion on body weight and adiposity.**

447 (A) Shp2 protein expression in different adipose depots (SubQ: subcutaneous; Epi:  
448 epididymal; Ret: retroperitoneal; Vis: visceral; BAT: brown adipose tissue) of wild type  
449 male mice on regular chow or a HFD (for 12 weeks). Each lane represents sample from a  
450 different mouse. (B) Quantitative determination of Shp2 protein expression, normalized  
451 to Tubulin, from 3 mice per genotype. Body weight of male (C, E) and female (D, F)

452 Cre (n= 9), flx/flx (n= 9), and FSHKO (n= 9) mice on a HFD (**C, D**) and chow (**E, F**).  
453 Total white adipose tissue weight (**G, J**), adiposity index (**H, K**), and head-rump length  
454 (cm) (**I, L**) of male (G-I) and female (J-L) mice on HFD for 12 weeks. Adiposity index  
455 (H) in FSHKO and fl/fl mice (H) has a P value of 0.052. \* Indicates statistically  
456 significant difference in Shp2 expression between chow and HFD fed mice (\*,  $P \leq 0.05$ ;  
457 \*\*,  $P \leq 0.01$ ).

458

459 **Figure 3: Insulin sensitivity and glucose tolerance in mice with adipose-specific Shp2**

460 **deletion.** (**A-D**) Insulin tolerance tests (ITTs) in male (A, C) and female (B, D) Cre (n=  
461 9), flx/flx (n= 9), and FSHKO (n= 9) mice on a HFD (A, B) and chow (C, D) at 14 weeks  
462 of age (insulin 1 mU/g B.W.). (**E-H**) Glucose tolerance tests (GTTs) in male (E, G) and  
463 females (F, H) Cre (n= 9), flx/flx (n= 9), and FSHKO (n= 9) mice on a HFD (E, F) and  
464 chow (G, H) at 15 weeks of age (glucose dose, 2 mg/g B.W.). (**I, J**) Male mice (30  
465 weeks old) were injected intraperitoneally with saline or insulin (10 mU/g B.W.) and  
466 sacrificed after 10 minutes. Total adipose tissue lysates were immunoblotted for pAkt  
467 (S473) (I) and pErk (J) and the corresponding total proteins. Bar graph indicates  
468 quantitation of Akt and Erk phosphorylation (adjusted to protein level) from at least 4  
469 mice per group. All blots were scanned and quantified using FluorChem 8900 and  
470 statistical analysis was performed using two-tailed Student's *t*-test. \* Indicates  
471 statistically significant difference between basal and insulin stimulated conditions for  
472 each genotype (\*,  $P \leq 0.05$ ; \*\*,  $P \leq 0.01$ ).

473
